# Supplementary material
Source: publisher site journal article supplement (https://www.dovepress.com/article/238930)
Supplement: Supplementary file 1 [file get_supplementary_file.php]

**Supporting Material**

**Table S1** The underlying data of single and clustered CRFs, stratified by age groups and gender.

| Gender | Age group | Hypertension | | Dyslipidemia | | Diabetes mellitus | | Obesity | | ≥1 CRF | | ≥2 CRFs | | ≥3 CRFs | |
| --- | --- | --- | --- | --- | --- | --- | --- | --- | --- | --- | --- | --- | --- | --- | --- |
| yes | no | yes | no | yes | no | yes | no | yes | no | yes | no | yes | no |
| Men | 40-44 | 21 | 33 | 49 | 5 | 2 | 52 | 12 | 42 | 52 | 2 | 26 | 28 | 5 | 49 |
| 45-49 | 96 | 155 | 204 | 47 | 12 | 239 | 71 | 180 | 225 | 26 | 114 | 137 | 39 | 212 |
| 50-54 | 174 | 224 | 330 | 68 | 27 | 371 | 99 | 299 | 367 | 31 | 194 | 204 | 62 | 336 |
| 55-59 | 268 | 211 | 371 | 108 | 65 | 414 | 153 | 326 | 446 | 33 | 270 | 209 | 117 | 362 |
| 60-64 | 244 | 164 | 290 | 118 | 60 | 348 | 126 | 282 | 371 | 37 | 240 | 168 | 89 | 319 |
| Women | 40-44 | 13 | 76 | 66 | 23 | 2 | 87 | 9 | 80 | 69 | 20 | 17 | 72 | 4 | 85 |
| 45-49 | 118 | 317 | 333 | 102 | 11 | 424 | 63 | 372 | 369 | 66 | 120 | 315 | 33 | 402 |
| 50-54 | 321 | 509 | 690 | 140 | 32 | 798 | 186 | 644 | 758 | 72 | 355 | 475 | 102 | 728 |
| 55-59 | 430 | 550 | 808 | 172 | 57 | 923 | 270 | 710 | 904 | 76 | 473 | 507 | 172 | 808 |
| 60-64 | 463 | 348 | 628 | 183 | 74 | 737 | 273 | 538 | 762 | 49 | 465 | 346 | 183 | 628 |
| Both genders | 40-44 | 34 | 109 | 115 | 28 | 4 | 139 | 21 | 122 | 121 | 22 | 43 | 100 | 9 | 134 |
| 45-49 | 214 | 472 | 537 | 149 | 23 | 663 | 134 | 552 | 594 | 92 | 234 | 452 | 72 | 614 |
| 50-54 | 495 | 733 | 1020 | 208 | 59 | 1169 | 285 | 943 | 1125 | 103 | 549 | 679 | 164 | 1064 |
| 55-59 | 698 | 761 | 1179 | 280 | 122 | 1337 | 423 | 1036 | 1350 | 109 | 743 | 716 | 289 | 1170 |
| 60-64 | 707 | 512 | 918 | 301 | 134 | 1085 | 399 | 820 | 1133 | 86 | 705 | 514 | 272 | 947 |

**Table S2** Unadjusted IRRs (95% CIs) of CVD risk factors vs. non CVD risk factors associated with age groups.

|  | 60-64 | 55-59 | 50-54 | 45-49 | 40-44 |
| --- | --- | --- | --- | --- | --- |
| Hypertension | 1.00 (ref) | 0.82 (0.77, 0.89) *** | 0.70 (0.64, 0.76) *** | 0.54 (0.48, 0.61) *** | 0.41 (0.30, 0.55) *** |
| Dyslipidemia | 1.00 (ref) | 1.07 (1.03, 1.12) | 1.10 (1.06, 1.15) * | 1.04 (0.99, 1.09) | 1.07 (0.98, 1.16) |
| Diabetes mellitus | 1.00 (ref) | 0.76 (0.60, 0.96) * | 0.44 (0.33, 0.59) *** | 0.31 (0.20, 0.47) *** | 0.25 (0.10, 0.68) ** |
| Obesity | 1.00 (ref) | 0.89 (0.79, 0.99) | 0.71 (0.62, 0.81) *** | 0.60 (0.50, 0.71) *** | 0.45 (0.30, 0.67) *** |
| ≥1 risk factor | 1.00 (ref) | 1.00 (0.97, 1.02) | 0.99 (0.96, 1.01) | 0.93 (0.90, 0.96) | 0.91 (0.85, 0.98) |
| ≥2 risk factors | 1.00 (ref) | 0.88 (0.82, 0.94) * | 0.77 (0.71, 0.84) *** | 0.59 (0.53, 0.66) *** | 0.52 (0.40, 0.67) *** |
| ≥3 risk factors | 1.00 (ref) | 0.89 (0.77, 1.03) | 0.60 (0.50, 0.71) *** | 0.47 (0.37, 0.60) *** | 0.28 (0.15, 0.54) *** |

**Note:** * *P* < 0.05; ** *P* < 0.01; *** *P* < 0.001 vs 60-64y age group.

**Table S3** Sensitivity analysis of the adjusted Poisson regression models for CVD risk factors associated with age

|  | 60-64 | 55-59 | 50-54 | 45-49 | 40-44 |
| --- | --- | --- | --- | --- | --- |
| Hypertension | 1.00 (ref) | 0.84 (0.77, 0.92)** | 0.73 (0.66, 0.80)*** | 0.57 (0.50, 0.65)*** | 0.44 (0.33, 0.60)*** |
| Dyslipidemia | 1.00 (ref) | 1.06 (1.02, 1.11) | 1.07 (1.02, 1.11) | 1.00 (0.95, 1.05) | 1.02 (0.93, 1.12) |
| Diabetes mellitus | 1.00 (ref) | 0.74 (0.56, 0.98)* | 0.48 (0.34, 0.67)*** | 0.33 (0.21, 0.53)*** | 0.22 (0.07, 0.68)** |
| Obesity | 1.00 (ref) | 0.92 (0.80, 1.05) | 0.77 (0.66, 0.89)** | 0.68 (0.56, 0.81)*** | 0.49 (0.32, 0.74)** |
| ≥1 risk factor | 1.00 (ref) | 1.00 (0.97, 1.02) | 0.98 (0.96, 1.01) | 0.94 (0.91, 0.97) | 0.91 (0.85, 0.98) |
| ≥2 risk factors | 1.00 (ref) | 0.90 (0.83, 0.98) | 0.80 (0.73, 0.87)*** | 0.61 (0.54, 0.69)*** | 0.55 (0.42, 0.71)*** |
| ≥3 risk factors | 1.00 (ref) | 0.92 (0.77, 1.10) | 0.66 (0.54, 0.80)*** | 0.52 (0.4, 0.68)*** | 0.29 (0.15, 0.57)*** |

**Note:** All subjects (n=679) with self-reported stroke or/and ischemic heart disease or/and coronary artery disease were excluded from the database. Gender; smoking status categorised as non-smoker (never smoker and former smoker) or smoker (current smoker); drinking status categorised as (never drinker and former drinker) or drinker (current drinker); moderate to vigorous physical activity in leisure categorised as yes or no. * *P* < 0.05; ** *P* < 0.01; *** *P* < 0.001 vs 60-64y age group.
